# Supplementary material for: Domestication of Chili Pepper Has Altered Fruit Traits Affecting the Oviposition and Feeding Behavior of the Pepper Weevil
Source: MDPI journal article supplement (doi:10.3390/insects12070630), 2021-07-12
Supplement: s1 [file s1]

## Supplementary material

# DOMESTICATION OF CHILI PEPPER ALTERED FRUIT TRAITS AND AFFECTING THE OVIPOSITION AND FEEDING BEHAVIOR OF THE PEPPER WEEVIL

Yosra Chabaane<sup>1</sup>, Muhammed Haseeb<sup>2</sup> and Betty Benrey<sup>1,\*</sup>

**1** Laboratory of Evolutionary Entomology – University of Neuchâtel - Switzerland; [yosra.chabaane@unine.ch](mailto:yosra.chabaane@unine.ch)

**2** Center for Biological Control, College of Agriculture and Food Sciences, Florida A&M University, Tallahassee, USA; [muhammad.haseeb@famu.edu](mailto:muhammad.haseeb@famu.edu)

\*Correspondence: [betty.benrey@unine.ch](mailto:betty.benrey@unine.ch) Tel.: +41 32 718 31 32

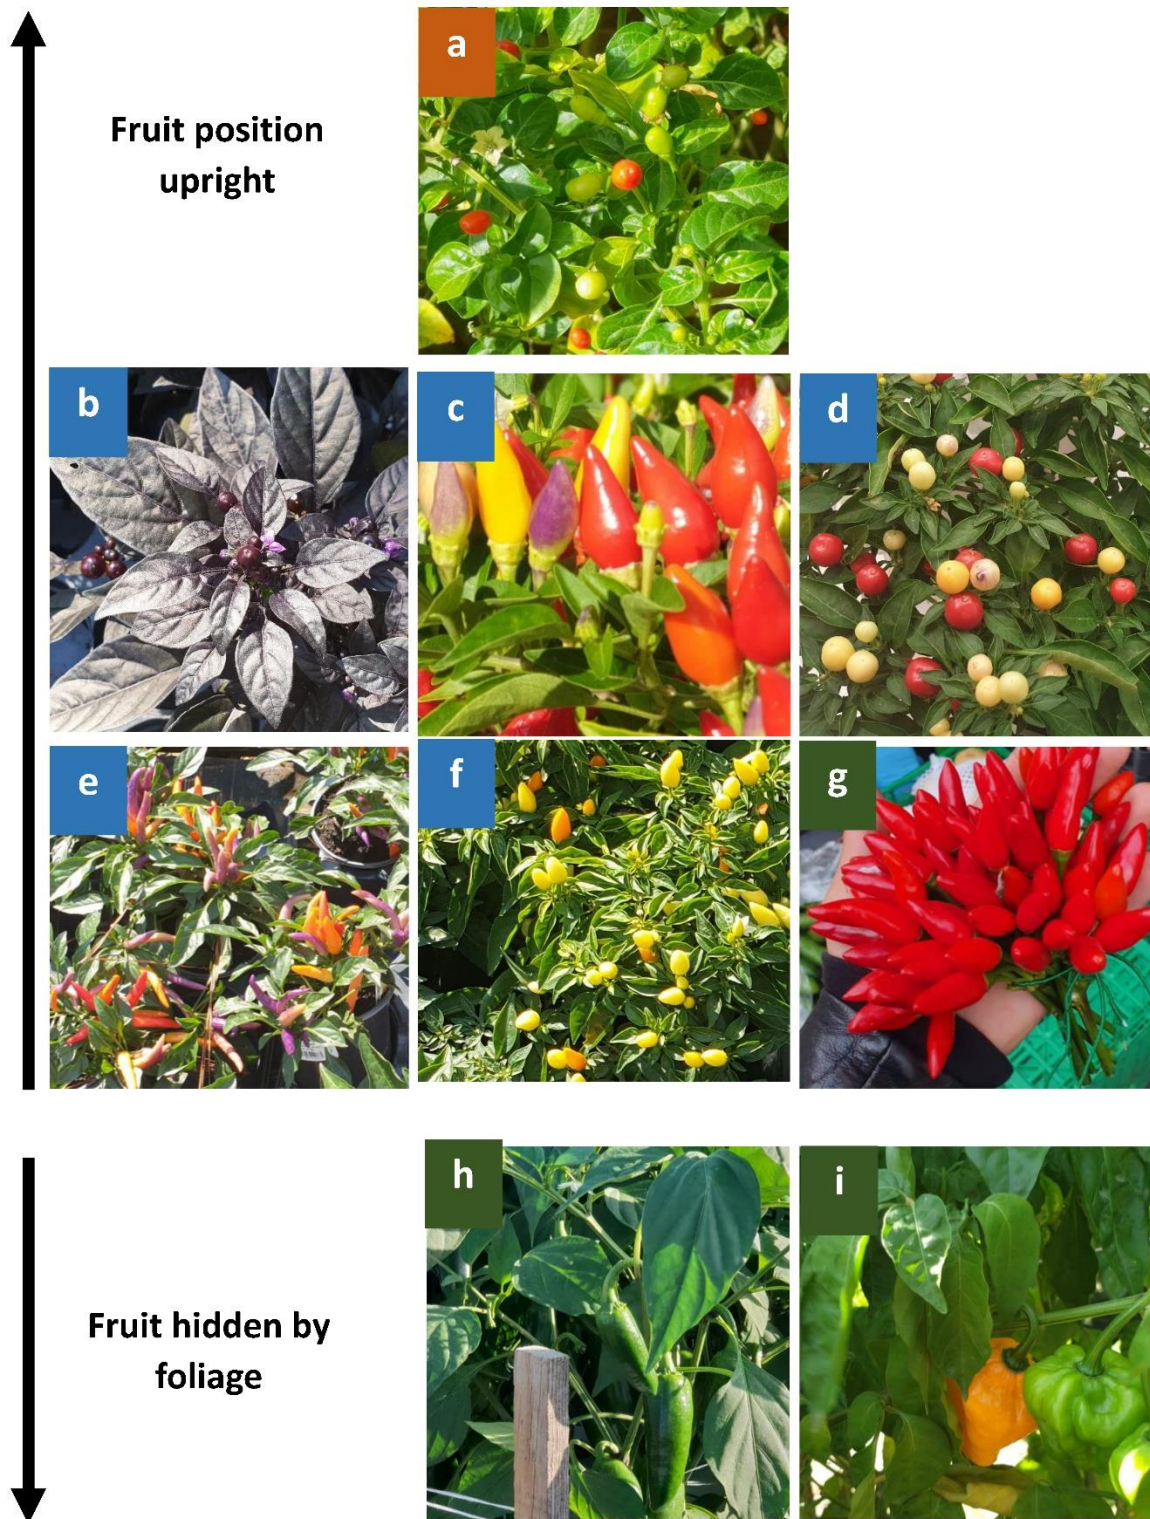

**Figure S1:** Fruit position for wild (Brown), domesticated as ornamental (Blue), and domesticated for consumption (Green) peppers. All images © Y. Chabaane.

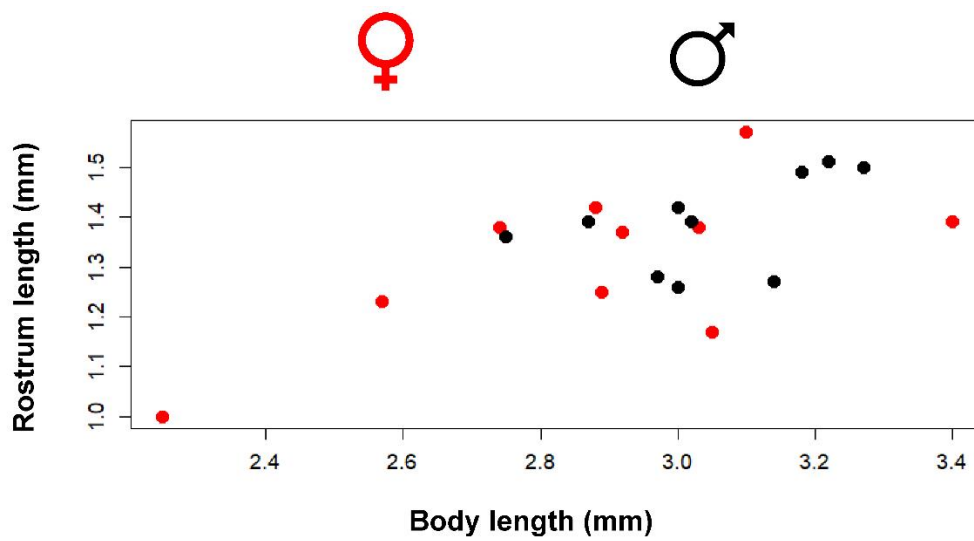

(a)

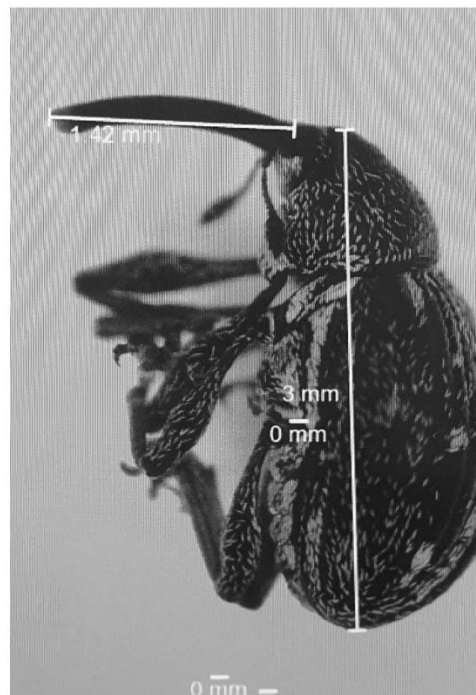

(b)

**Figure S2.** (a) Correlation between body length (mm) and rostrum length (mm) using 10 males and 10 female weevils. Method used to test correlation = Pearson's product-moment correlation ( $R = 0.658$ ). (b) Measurement of body and rostrum lengths of a female weevil taken using a Leica DMS1000 microscope with build-in 5.0 MPixel CMOS Camera and LAS X Core software (ver. 3.0.13). © Y. Chabaane.
